# Supplementary material
Source: PubMed Central journal article supplement (PMC10865842)
Supplement: mbio.02867-23-s0001.pdf [file mbio.02867-23-s0001.pdf]

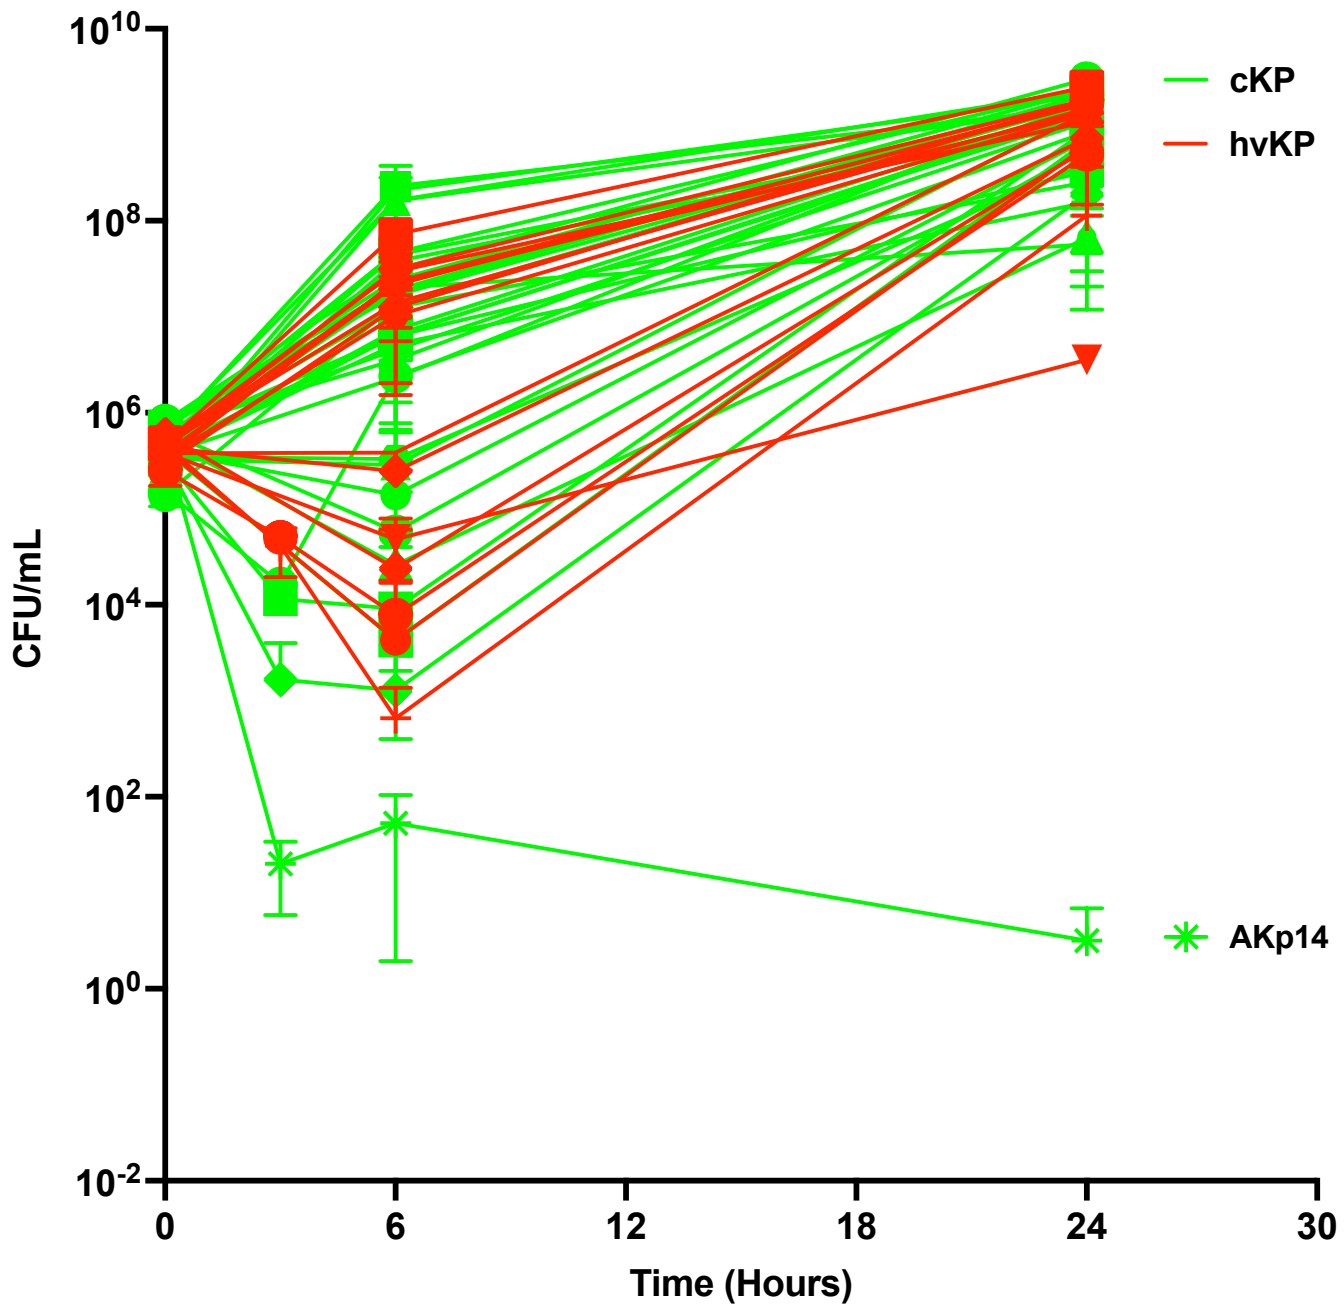

### Supplementary Figure 1

Forty-nine strains comprising the hvKp (n=16) and cKp (n=33) cohorts underwent assessment for growth/survival in human ascites via enumeration of colony forming units. A minimum of two biologic with one-three technical repeats was performed for each strain.
